# Supplementary material for: Tailor-made isostructural copper(ii) and nickel(ii) complexes with a newly designed (N,N)-donor scaffold as functional mimics of alkaline phosphatase
Source: Royal Society of Chemistry journal article supplement (doi:10.1039/d2nj06127a), 2023-01-01
Supplement: d2nj06127a1.pdf [file d2nj06127a1.pdf]

## Tailor-made isostructural copper(II) and nickel(II) complexes with a newly designed (N,N)-donor scaffold for functional mimics of alkaline phosphatase

Subhankar Kundu,<sup>a,§</sup> Subhajit Saha,<sup>a,§</sup> Subhra Jyoti Panda,<sup>b</sup> Chandra Shekhar Purohit,<sup>b</sup> and Bhaskar Biswas<sup>a,\*</sup>

### Supporting Information

#### Contents

|                                                                                                                                                                                                                                    |         |
|------------------------------------------------------------------------------------------------------------------------------------------------------------------------------------------------------------------------------------|---------|
| <b>A. Figures</b> .....                                                                                                                                                                                                            | S1-S15  |
| i. <sup>1</sup> H NMR spectrum of H <sub>2</sub> L.....                                                                                                                                                                            | S1      |
| ii. <sup>13</sup> C NMR spectrum of H <sub>2</sub> L.....                                                                                                                                                                          | S2      |
| iii. FT-IR spectra of H <sub>2</sub> L, <b>1</b> and <b>2</b> .....                                                                                                                                                                | S3      |
| iv. UV-Vis spectra of H <sub>2</sub> L and metal complexes.....                                                                                                                                                                    | S4      |
| v. HOMO LUMO of the complex <b>1</b> and complex <b>2</b> .....                                                                                                                                                                    | S5-S6   |
| vi. Plot of rate vs [pNPP] for the Cu(II) complex-mediated catalytic hydrolysis...                                                                                                                                                 | S7      |
| vii. Plot of rate vs [pNPP] for the Ni(II) complex-mediated catalytic hydrolysis...                                                                                                                                                | S8      |
| viii. Spectrophotometric titration of H <sub>2</sub> L with pNPP ...                                                                                                                                                               | S8      |
| ix. UV-Vis spectra of the Cu(II) complex at 0 min and after 7 days.....                                                                                                                                                            | S9      |
| x. UV-Vis spectra of the Ni(II) complex at 0 min and after 7 days .....                                                                                                                                                            | S10     |
| xi. ESI-MS spectrum of the copper(II)-Schiff base complex .....                                                                                                                                                                    | S11     |
| xii. ESI-MS spectrum of the nickel(II)-Schiff base complex .....                                                                                                                                                                   | S12     |
| xiii. ESI-MS spectrum of the copper(II)-Schiff base complex in presence of pNPP.                                                                                                                                                   | S13     |
| xiv. ESI-MS spectrum of the nickel(II)-Schiff base complex in presence of pNPP..                                                                                                                                                   | S14     |
| xv. <b>Fig. S15.</b> <sup>1</sup> H NMR spectrum of the Na-salt of H <sub>2</sub> L in CdCl <sub>3</sub> .....                                                                                                                     | S14     |
| xvi. <b>Fig. S16</b> Mulliken charge distribution on the oxygen and hydrogen atoms of the computationally optimized (a) ligand H <sub>2</sub> L (b) complex1 (c) complex2 (d) complex 1+pNPP adduct (e) complex 2+pNPP adduct..... | S15     |
| xvii. <b>Fig.S17</b> Determination of the pKa value of the ligand-OH in the Na salt of H <sub>2</sub> L, complex1 and complex 2 using the difference of absorbance upon pH variation..                                             | S15     |
| <b>B. Tables</b> .....                                                                                                                                                                                                             | S16-S18 |
| i. Selected bond lengths (Å) and bond angles (°) for <b>1</b> .....                                                                                                                                                                | S16     |
| ii. Selected bond lengths (Å) and bond angles (°) for <b>2</b> .....                                                                                                                                                               | S17     |
| iii. NBO charge distribution of the key intermediates of <b>1</b> and <b>2</b> .....                                                                                                                                               | S18     |
| <b>C. Coordinates of all the optimized geometries</b> .....                                                                                                                                                                        | S18-S25 |

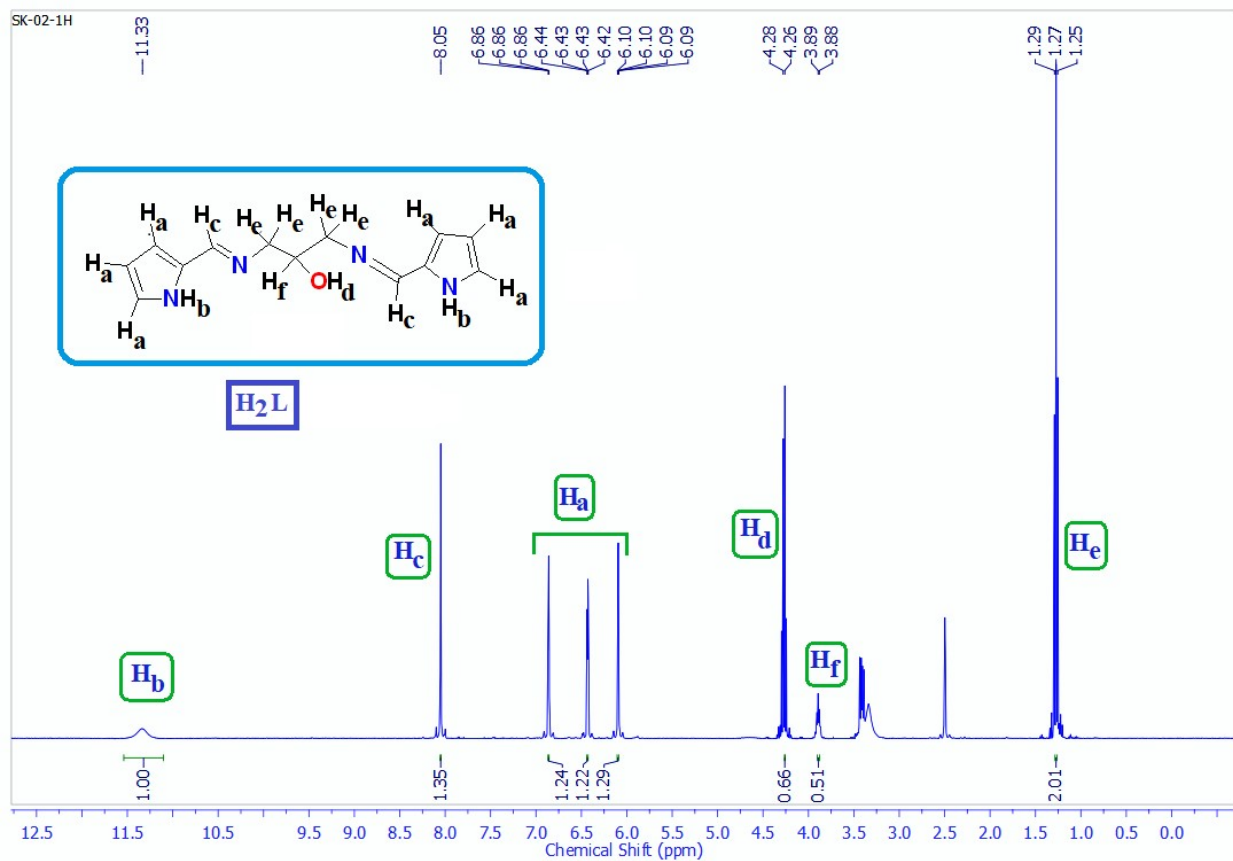

Fig. S1.  $^1H$  NMR spectrum of  $H_2Lin$  DMSO- $d_6$ .

SK02-13C

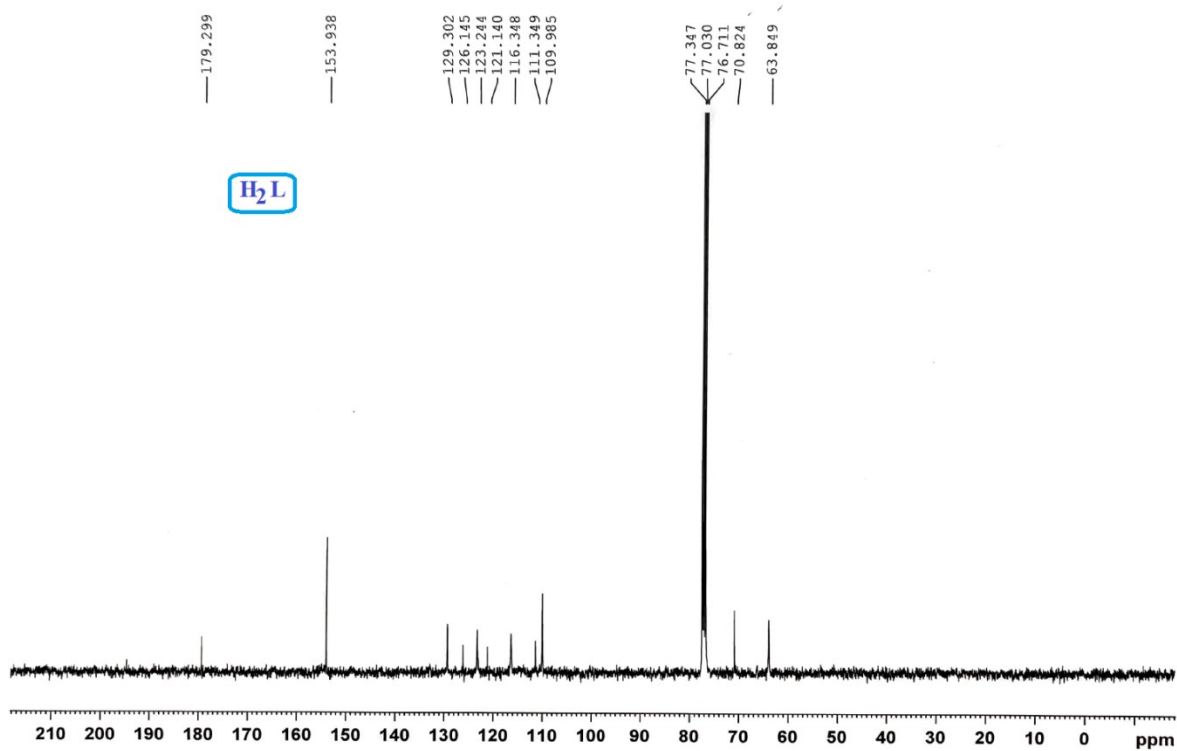

**Fig. S2.**  $^{13}\text{C}$  NMR spectrum of  $\text{H}_2\text{Lin}$  in  $\text{CDCl}_3$

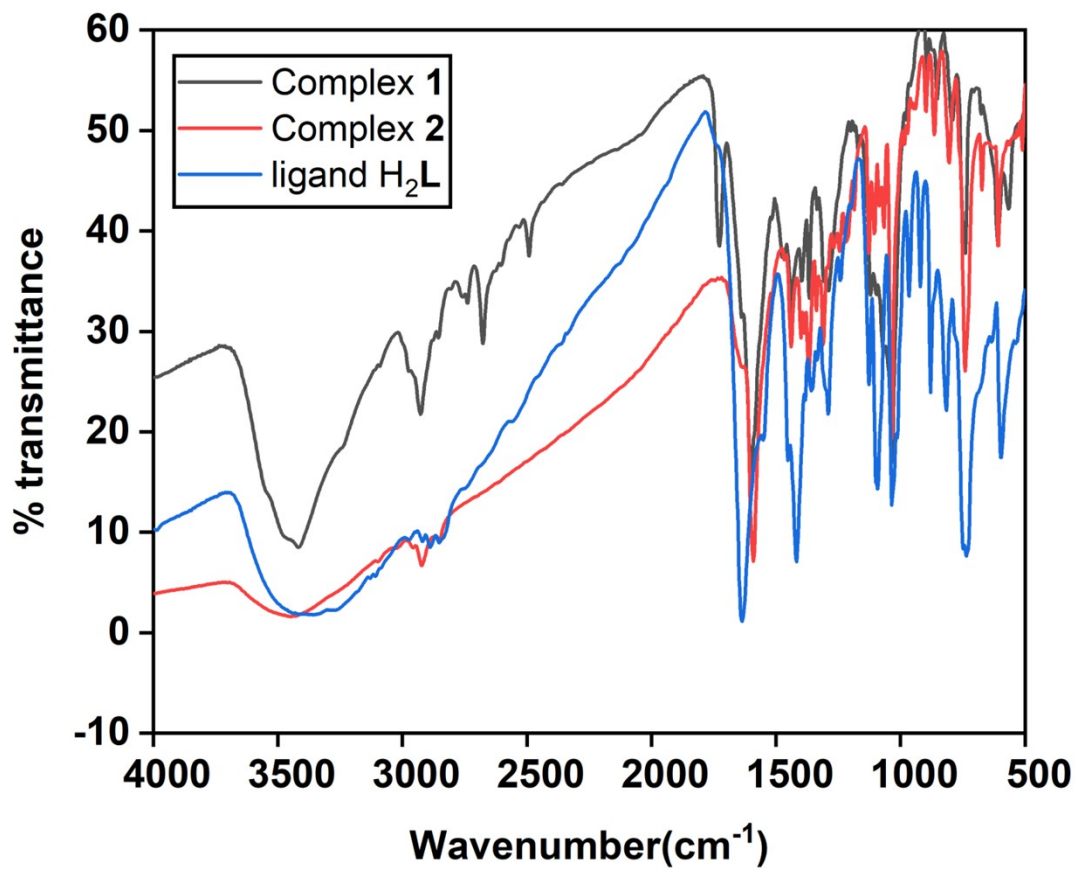

Fig. S3. FT-IR spectra of H<sub>2</sub>L, 1 and 2

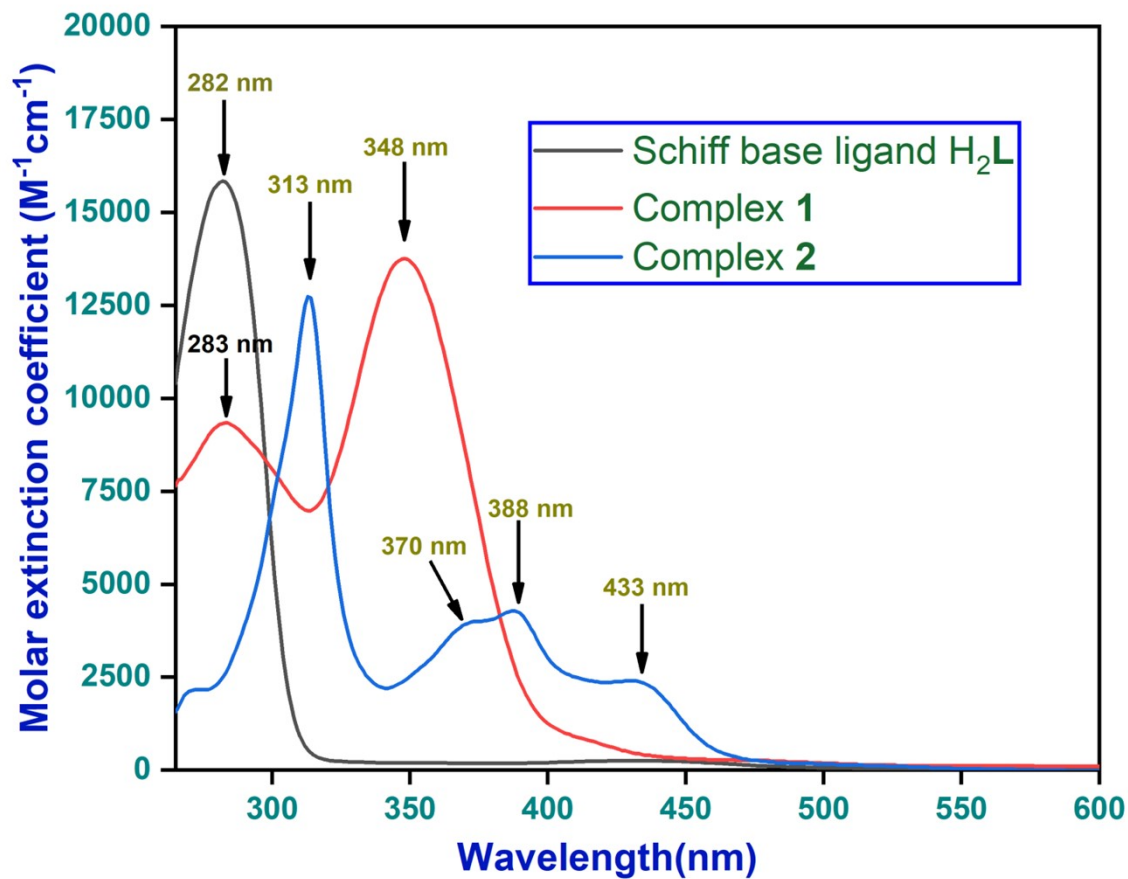

Fig.S4. UV-Vis spectra of  $H_2L$  and metal complexes in aq. DMF medium

|           | Complex 1                                                                                                                                            | Complex 2                                                                                                                                              |
|-----------|------------------------------------------------------------------------------------------------------------------------------------------------------|--------------------------------------------------------------------------------------------------------------------------------------------------------|
| HOMO/SOMO | 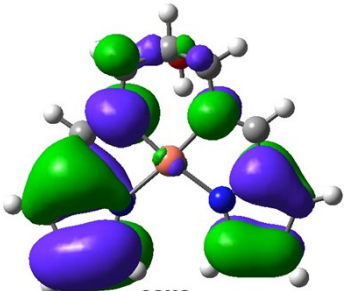 <p>SOMO<br/><math>E_{SOMO} = -130.77 \text{ kcal/mol}</math></p> |  <p>HOMO<br/><math>E_{HOMO} = -127.45 \text{ kcal/mol}</math></p> |

|                |                                                                                                                                                                                                   |                                                                                                                                                                                                     |
|----------------|---------------------------------------------------------------------------------------------------------------------------------------------------------------------------------------------------|-----------------------------------------------------------------------------------------------------------------------------------------------------------------------------------------------------|
| <b>HOMO -1</b> | 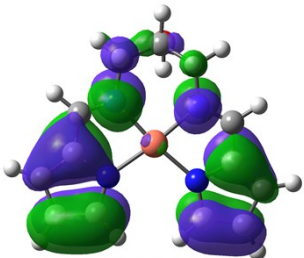 <p style="text-align: center;"><b>HOMO-1</b><br/><math>E_{\text{HOMO-1}} = -131.38 \text{ kcal/mol}</math></p>  |  <p style="text-align: center;"><b>HOMO-1</b><br/><math>E_{\text{HOMO-1}} = -130.29 \text{ kcal/mol}</math></p>  |
| <b>HOMO-2</b>  |  <p style="text-align: center;"><b>HOMO-2</b><br/><math>E_{\text{HOMO-2}} = -131.66 \text{ kcal/mol}</math></p>  |  <p style="text-align: center;"><b>HOMO-2</b><br/><math>E_{\text{HOMO-2}} = -139.24 \text{ kcal/mol}</math></p>  |
| <b>LUMO</b>    |  <p style="text-align: center;"><b>LUMO</b><br/><math>E_{\text{LUMO}} = -48.37 \text{ kcal/mol}</math></p>      |  <p style="text-align: center;"><b>LUMO</b><br/><math>E_{\text{LUMO}} = -41.67 \text{ kcal/mol}</math></p>      |
| <b>LUMO+1</b>  |  <p style="text-align: center;"><b>LUMO+1</b><br/><math>E_{\text{LUMO+1}} = -39.55 \text{ kcal/mol}</math></p> |  <p style="text-align: center;"><b>LUMO+1</b><br/><math>E_{\text{LUMO+1}} = -30.62 \text{ kcal/mol}</math></p> |
| <b>LUMO+2</b>  |  <p style="text-align: center;"><b>LUMO+2</b><br/><math>E_{\text{LUMO+2}} = -38.96 \text{ kcal/mol}</math></p> |  <p style="text-align: center;"><b>LUMO+2</b><br/><math>E_{\text{LUMO+2}} = -27.35 \text{ kcal/mol}</math></p> |

Fig.S5. HOMO LUMO of the complex 1 and complex 2

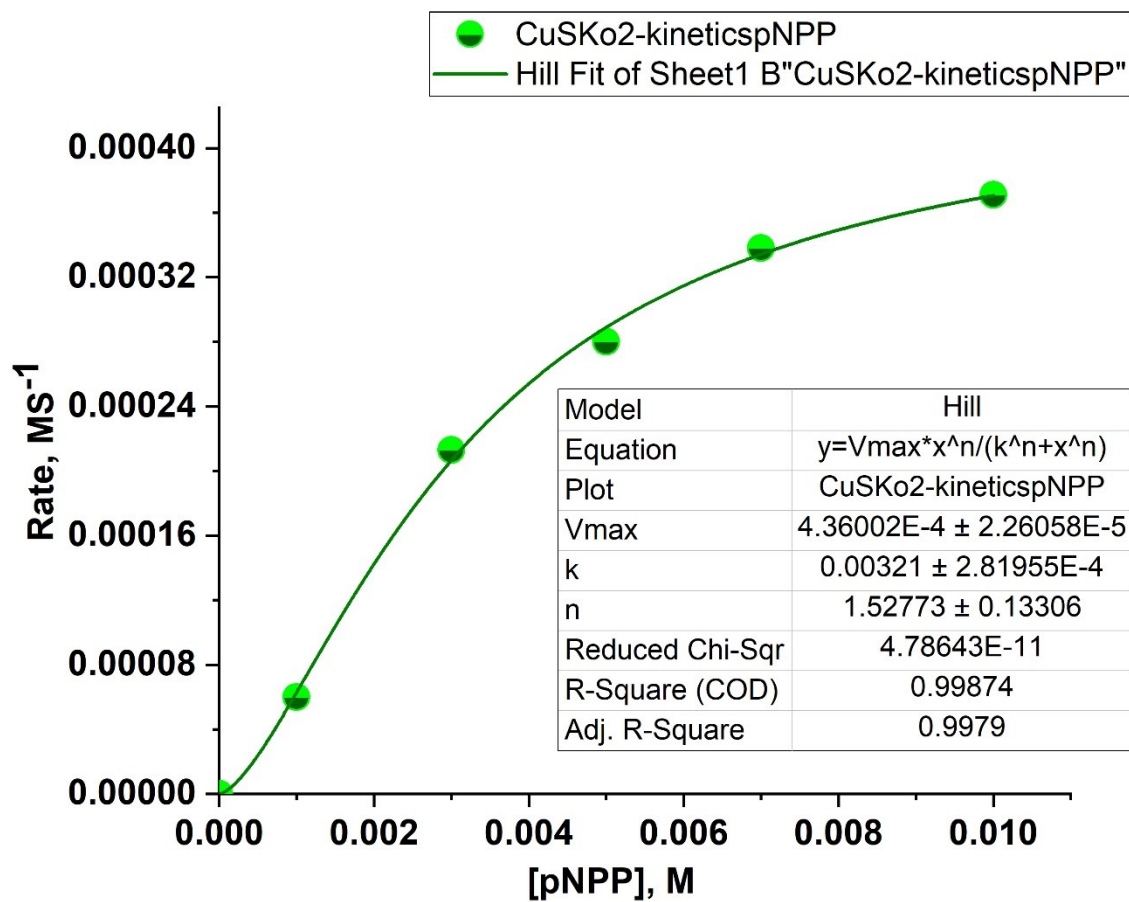

Fig. S6. Plot of rate vs [pNPP] for the Cu(II) complex-mediated catalytic hydrolysis of pNPP.

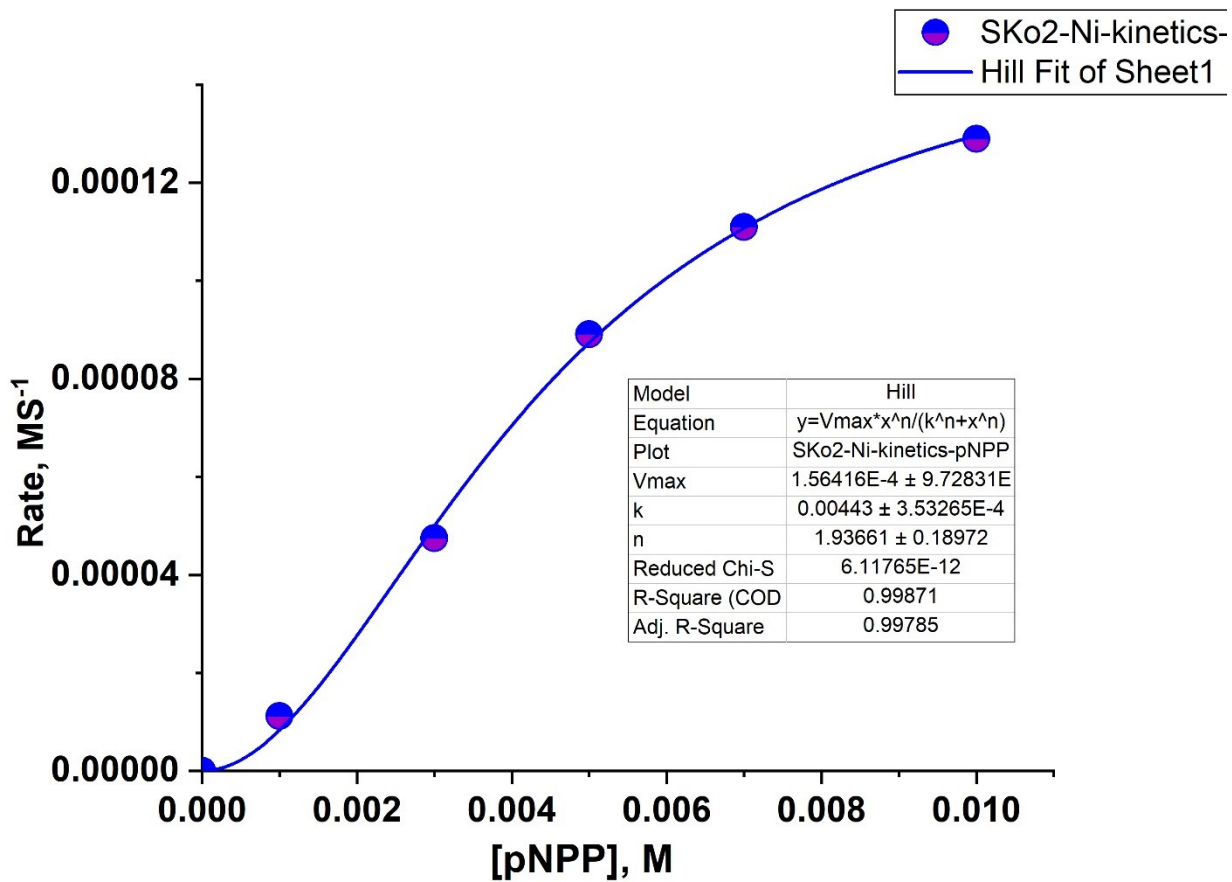

Fig. S7. Plot of rate vs [pNPP] for the Ni(II) complex-mediated catalytic hydrolysis of pNPP.

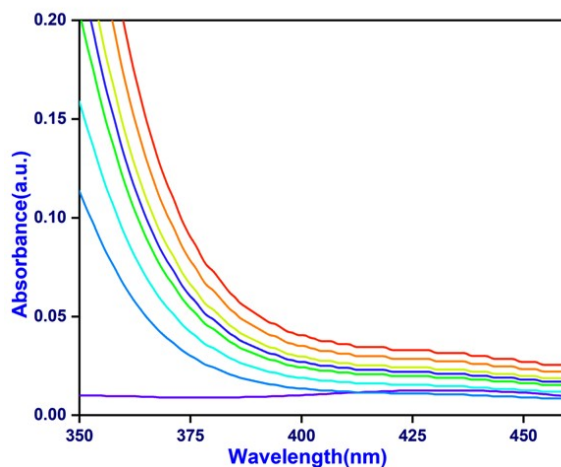

Fig S8. Spectrophotometric titration of  $H_2L$  with pNPP in 1:10 in aq. DMF



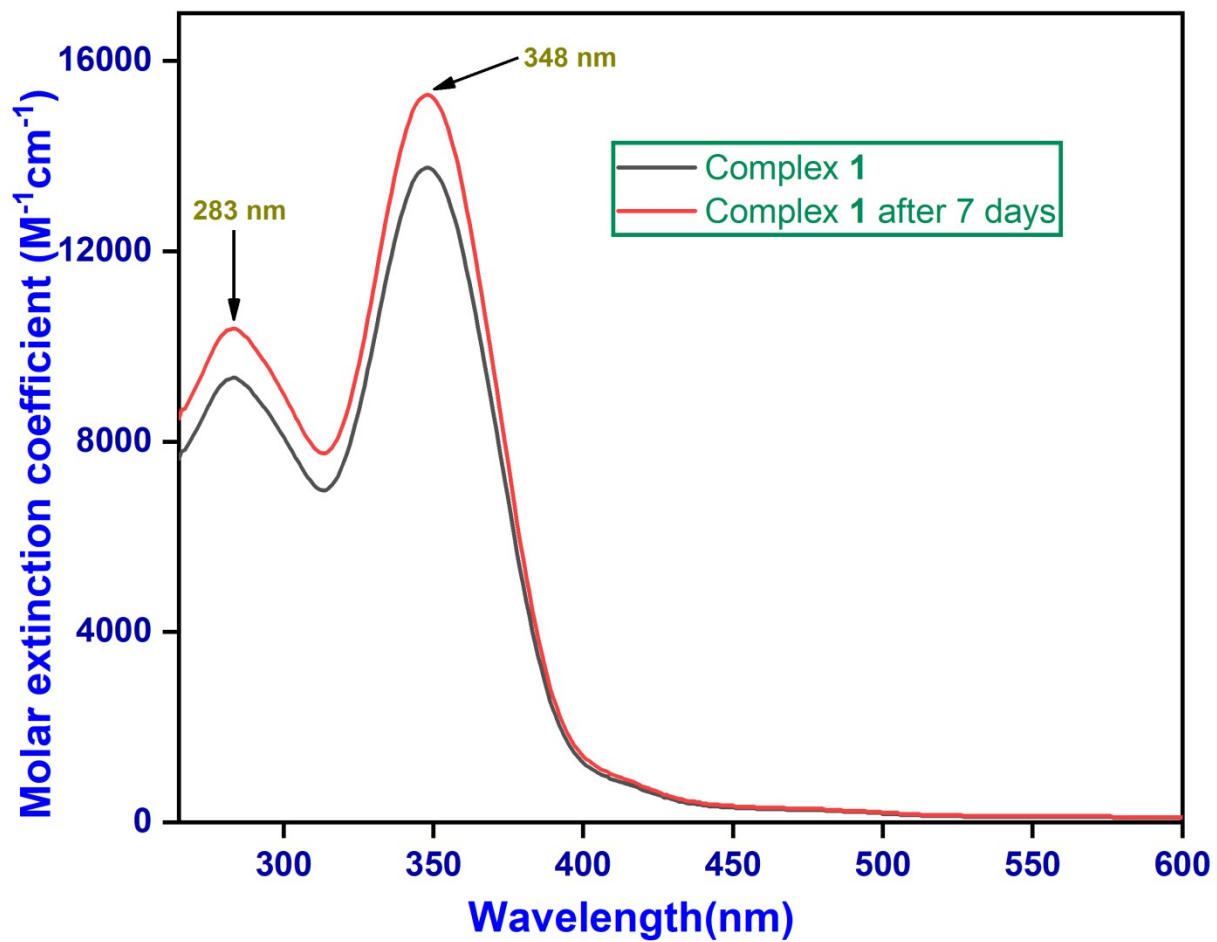

Fig. S9. UV-Vis spectra of the Cu(II) complex at 0 min and after 7 days in aq. DMF medium

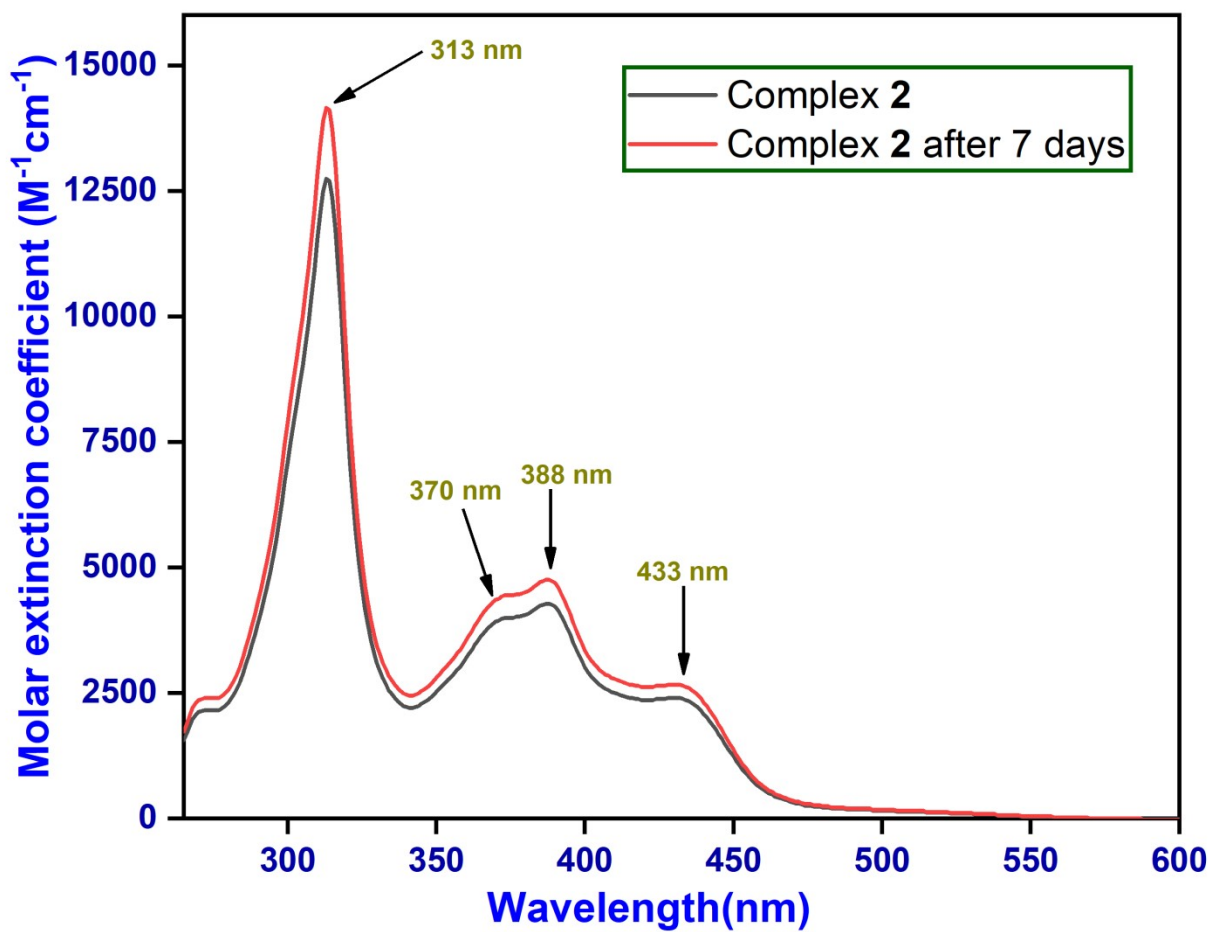

Fig. S10. UV-Vis spectra of the Ni(II) complex at 0 min and after 7 days in aq. DMF medium

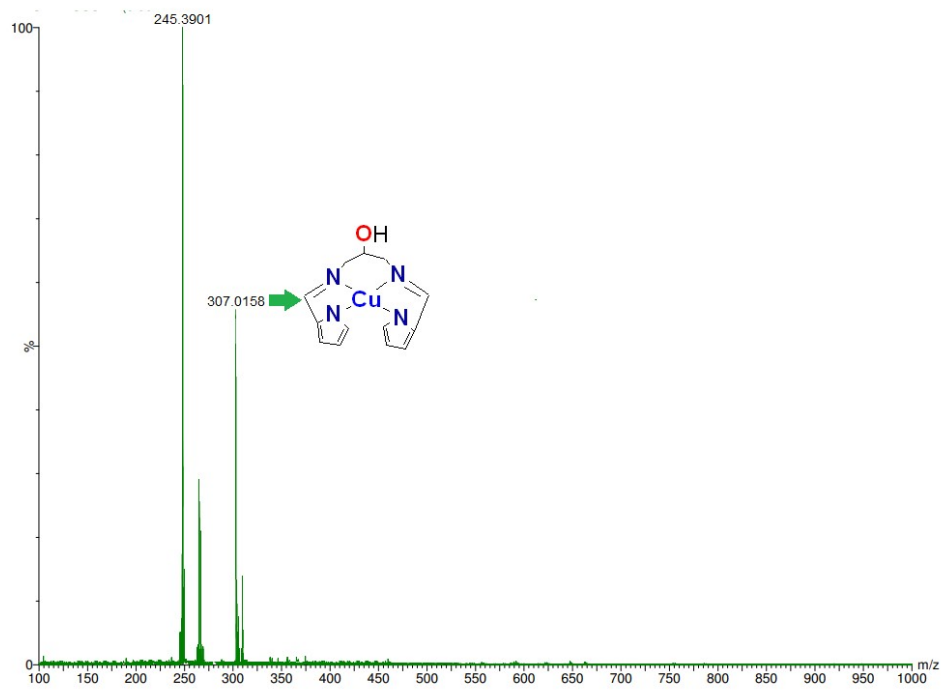

**Fig. S11.** ESI-MS spectrum of the copper(II)-Schiff base complex in aq. methanol

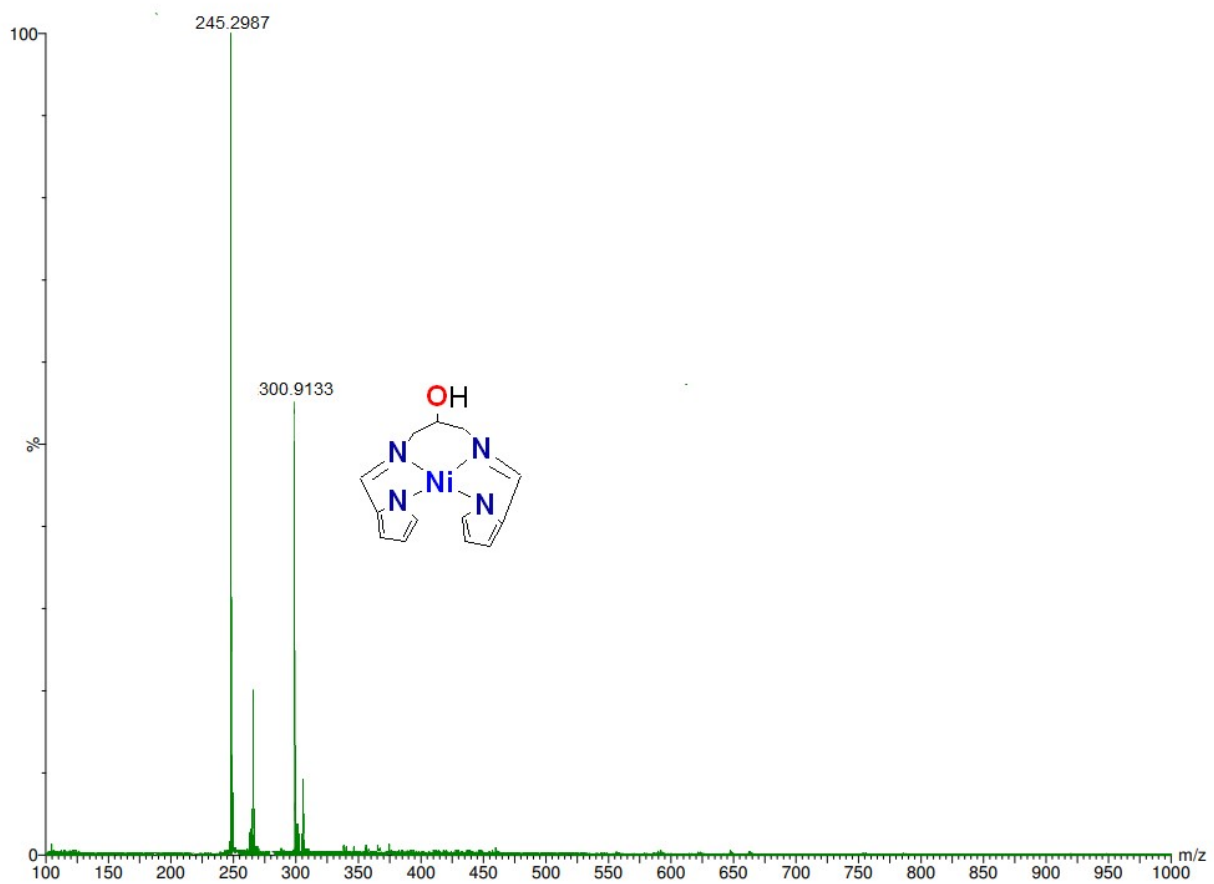

**Fig. S12.** ESI-MS spectrum of the nickel(II)-Schiff base complex in aqueous methanol

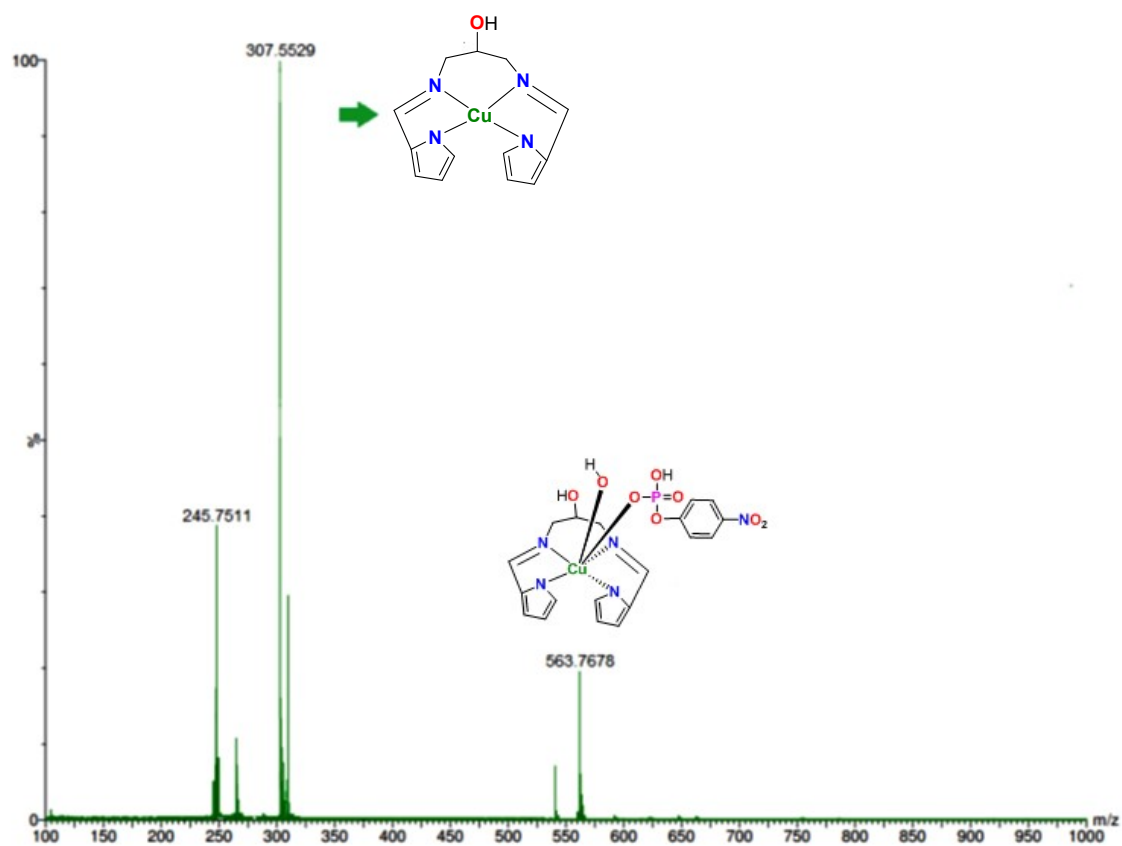

**Fig. S13.** ESI-MS spectrum of the copper(II)-Schiff base complex in presence of pNPP in aq. methanol

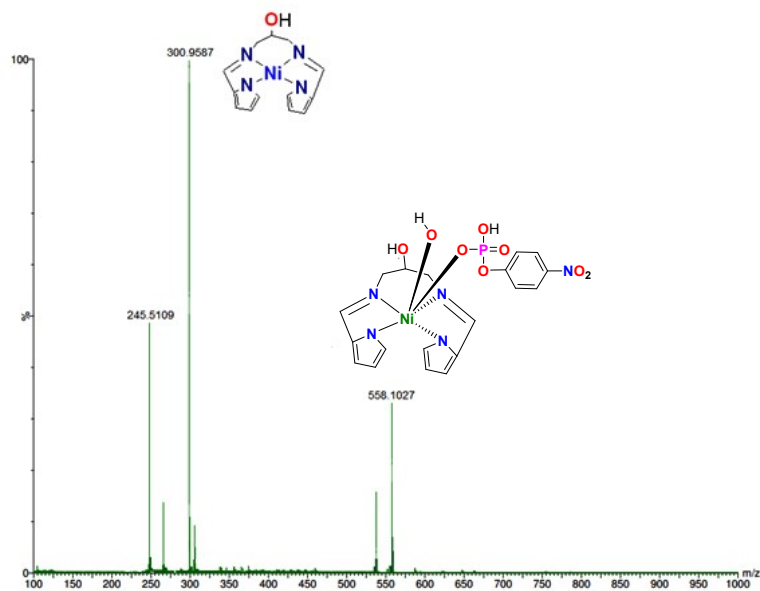

**Fig. S14.** ESI-MS spectrum of the nickel(II)-Schiff base complex in presence of pNPP in aq. Methanol

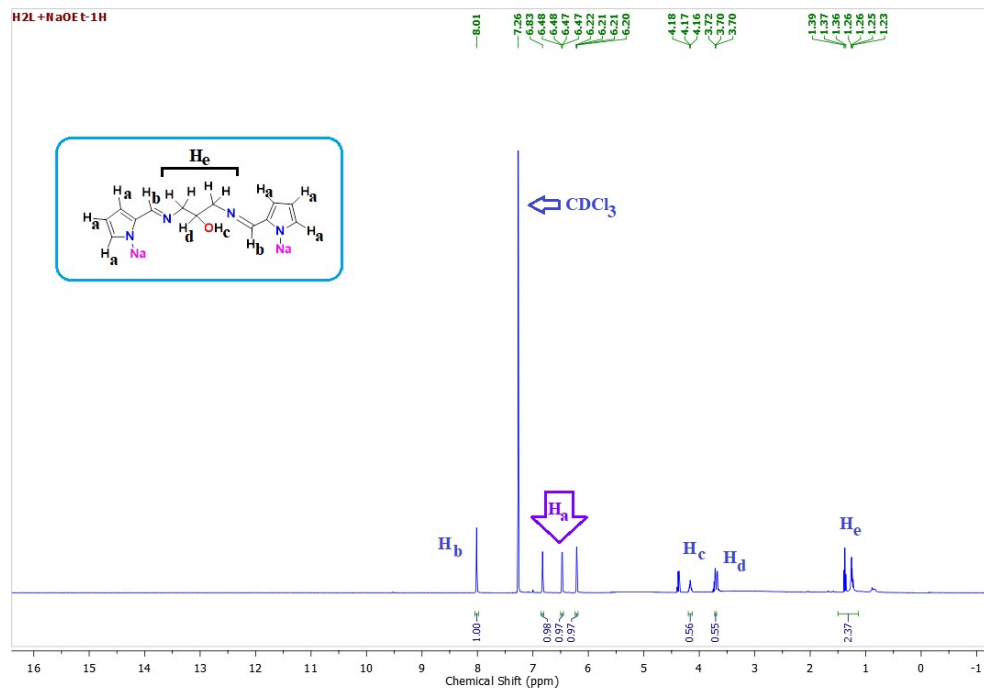

**Fig. S15.** <sup>1</sup>H NMR spectrum of the Na-salt of H<sub>2</sub>L in CdCl<sub>3</sub>.

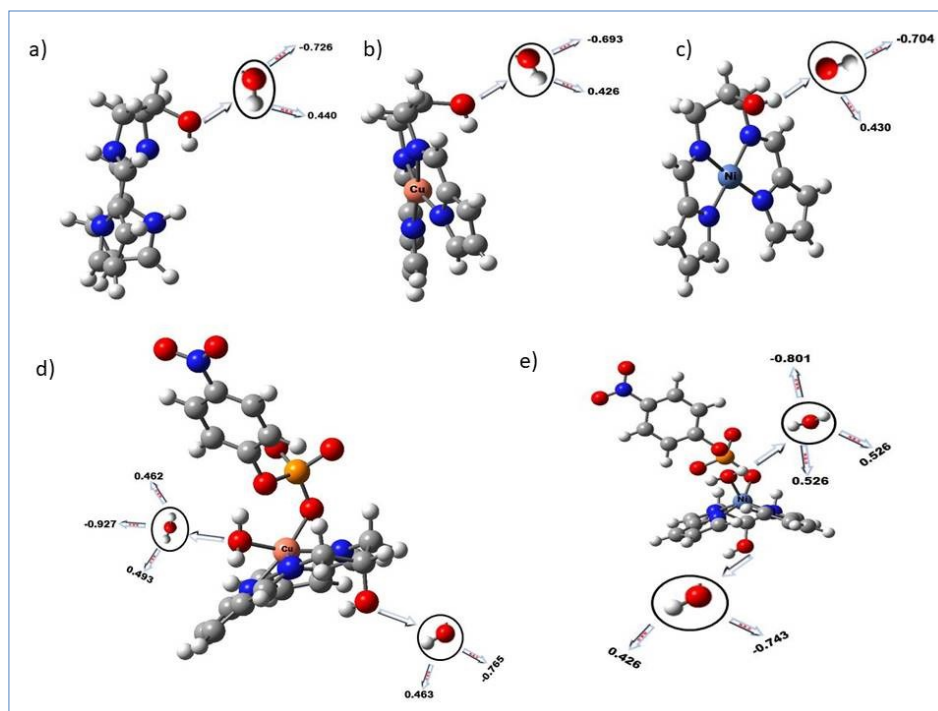

**Fig. S16** Mulliken charge distribution on the oxygen and hydrogen atoms of the computationally optimized (a) ligand H<sub>2</sub>L (b) complex1 (c) complex2 (d) complex 1+pNPP adduct (e) complex 2+pNPP adduct.

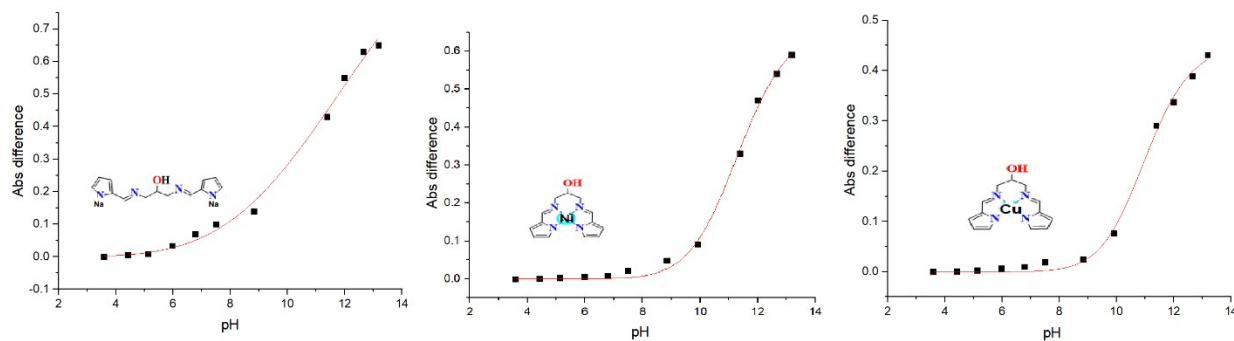

**Fig.S17** Determination of the pka value of the ligand-OH in the Na salt of H<sub>2</sub>L, complex1 and complex 2 using the difference of absorbance upon pH variation.

**Table S1.** Selected bond lengths (Å) and bond angles (°) for **1**

| Bond length (Å) | XRD      | DFT   | Bond length (Å) | XRD      | DFT   |
|-----------------|----------|-------|-----------------|----------|-------|
| Cu1-N1          | 1.950(4) | 1.972 | Cu3 -N9         | 1.987(3) | 1.987 |
| Cu1-N2          | 1.973(4) | 1.969 | Cu3 -N10        | 2.000(3) | 2.000 |
| Cu1-N3          | 1.970(4) | 2.022 | Cu3 -N11        | 1.966(3) | 1.966 |
| Cu1-N4          | 1.999(4) | 2.017 | Cu3 -N12        | 1.958(3) | 1.958 |
| Cu2 -N1AA       | 1.993(4) | 2.022 | Cu4 -N14        | 1.999(3) | 2.023 |
| Cu2 -N0AA       | 1.978(4) | 2.017 | Cu4 -N16        | 1.984(3) | 2.017 |
| Cu2 -N7         | 1.958(3) | 1.972 | Cu4 -N13        | 1.962(3) | 1.969 |
| Cu2 -N8         | 1.948(3) | 1.969 | Cu4 -N15        | 1.958(3) | 1.972 |

| Bond angles (°) | XRD        | DFT     | Bond angles (°) | XRD        | DFT     |
|-----------------|------------|---------|-----------------|------------|---------|
| N1-Cu1 -N4      | 82.63(19)  | 82.780  | N1A -Cu2-N0AA   | 91.44(14)  | 91.571  |
| N1 -Cu1 -N2     | 103.5(2)   | 102.722 | Cu2 -N1AA -C17  | 111.6(3)   | 111.439 |
| N1 -Cu1 -N3     | 173.5(2)   | 171.786 | N1AA-Cu2 -N7    | 173.14(14) | 171.786 |
| N3 -Cu1 -N4     | 91.34(15)  | 91.571  | Cu2 -N1AA -C16  | 128.5(3)   | 128.124 |
| N2 -Cu1 -N3     | 82.68(19)  | 82.897  | N1AA -Cu2 -N8   | 82.92(14)  | 82.897  |
| N2 -Cu1 -N4     | 173.34(17) | 174.469 | N0AA -Cu2 -N7   | 83.23(14)  | 82.780  |
| Cu1 -N1 -C4     | 111.4(3)   | 111.488 | Cu2 -N0AA -C14  | 126.6(3)   | 127.142 |
| Cu1 -N1 -C1     | 141.2(5)   | 141.652 | N0AA-Cu2-N8     | 174.28(15) | 174.468 |
| Cu1-N2-C10      | 110.7(3)   | 111.401 | Cu2-N0AA-C26    | 112.2(3)   | 111.893 |
| Cu1-N2-C13      | 142.5(5)   | 141.734 | N7 -Cu2 -N8     | 102.47(15) | 102.722 |
| Cu1-N3-C8       | 126.9(3)   | 128.123 | Cu2 -N7 -C25    | 110.6(3)   | 111.488 |
| Cu1-N3-C9       | 112.4(3)   | 111.439 | Cu2 -N7 -C22    | 142.4(3)   | 141.652 |
| Cu1-N4-C0AA     | 127.9(3)   | 127.412 | Cu2 -N8 -C21    | 143.1(3)   | 141.734 |
| Cu1-N4-C1AA     | 111.4(3)   | 111.893 | Cu2 -N8 -C18    | 111.6(3)   | 111.401 |
| N10 -Cu3 -N11   | 170.61(13) | 170.61  | Cu3 -N12 -C34   | 141.8(3)   | 141.9   |
| N9 -Cu3 -N10    | 91.71(13)  | 91.81   | N14 -Cu4 -N15   | 166.81(13) | 171.786 |
| N10 -Cu3 -N12   | 82.96(13)  | 82.95   | N13 -Cu4 -N16   | 173.52(13) | 174.46  |
| N11 -Cu3 -N12   | 103.22(14) | 103.21  | N14 -Cu4 -N16   | 91.55(13)  | 91.571  |



|               |            |         |               |            |         |
|---------------|------------|---------|---------------|------------|---------|
| N9 -Cu3 -N12  | 173.47(13) | 173.50  | N15 -Cu4 -N16 | 83.00(13)  | 82.780  |
| N9 -Cu3 -N11  | 82.55(14)  | 82.55   | N13 -Cu4 -N14 | 83.03(13)  | 82.897  |
| Cu3 -N9 -C27  | 127.4(2)   | 127.40  | N13 -Cu4 -N15 | 103.05(13) | 102.722 |
| Cu3 -N9 -C39  | 112.3(3)   | 112.35  | Cu4 -N13 -C45 | 143.3(3)   | 141.734 |
| Cu3 -N10 -C30 | 111.6(2)   | 111.65  | Cu4 -N13 -C48 | 110.0(2)   | 111.401 |
| Cu3 -N10 -C29 | 128.1(2)   | 128.21  | Cu4 -N14 -C49 | 111.1(3)   | 111.439 |
| Cu3 -N11 -C35 | 142.8(3)   | 143.1   | Cu4 -N14 -C50 | 128.7(3)   | 128.123 |
| Cu3 -N11 -C38 | 111.1(3)   | 111.2   | Cu4 -N15 -C44 | 142.2(3)   | 141.652 |
| Cu3 -N12 -C31 | 111.1(2)   | 111.2   | Cu4 -N15-C41  | 110.9(3)   | 111.488 |
| Cu4 -N16 -C52 | 126.8(2)   | 127.142 | Cu4 -N16-C40  | 111.9(3)   | 111.893 |

**Table S2.** Selected bond lengths (Å) and bond angles (°) for **2**

| Bond length (Å) | XRD        | DFT   | Bond length (Å) | XRD      | DFT   |
|-----------------|------------|-------|-----------------|----------|-------|
| Ni2 - N3        | 1.891(2)   | 1.890 | Ni1 -N27        | 1.913(2) | 1.931 |
| Ni2 - N9        | 1.9030(19) | 1.902 | Ni1 -N31        | 1.897(2) | 1.922 |
| Ni2 -N13        | 1.904(2)   | 1.904 | Ni1 -N21        | 1.895(2) | 1.897 |
| Ni2 -N16        | 1.8944(19) | 1.893 | Ni1 -N34        | 1.888(2) | 1.899 |

| Bond angles (°) | XRD        | DFT     | Bond angles (°) | XRD        | DFT     |
|-----------------|------------|---------|-----------------|------------|---------|
| N3 -Ni2-N9      | 83.99(9)   | 84.004  | N27-Ni1-N34     | 171.80(8)  | 172.11  |
| N3 -Ni2-N13     | 175.35(9)  | 175.33  | Ni1 -N34 -C35   | 112.79(17) | 112.66  |
| N3 -Ni2 -N16    | 98.25(9)   | 98.265  | N31-Ni1-N34     | 83.79(9)   | 98.52   |
| N9 -Ni2-N13     | 93.62(8)   | 93.596  | Ni1-N34 -C38    | 140.60(18) | 140.33  |
| N9 -Ni2-N16     | 177.67(9)  | 177.636 | N21-Ni1-N27     | 83.72(9)   | 83.92   |
| Ni1-N21-C25     | 141.62(19) | 140.67  | N21-Ni1-N31     | 177.69(9)  | 175.77  |
| Ni1-N21-C22     | 112.13(15) | 112.45  | Ni2 -N3-C7      | 141.35(19) | 141.336 |
| Ni1-N27-C26     | 113.44(17) | 112.74  | Ni2 -N3-C4      | 112.38(17) | 112.36  |
| Ni1 -N27-C28    | 128.26(17) | 128.07  | Ni2 -N9-C8      | 113.95(16) | 113.93  |
| Ni1-N31-C30     | 126.37(17) | 126.29  | Ni2 -N9-C10     | 127.76(17) | 127.797 |
| N13-Ni2-N16     | 84.10(8)   | 83.93   | Ni2 -N13-C12    | 128.03(17) | 128.033 |

|              |            |        |              |            |         |
|--------------|------------|--------|--------------|------------|---------|
| N21-Ni1-N34  | 98.49(9)   | 98.52  | Ni2 -N13-C14 | 113.33(17) | 113.286 |
| Ni1 -N31-C32 | 114.38(16) | 113.51 | Ni2 -N16-C20 | 141.64(19) | 141.629 |
| N27 -Ni1-N31 | 93.97(9)   | 94.24  | Ni2 -N16-C17 | 111.76(15) | 111.771 |

**Table S3.** NBO charge distribution of the key intermediates of complex 1 and complex 2

| Complex 1 | NBO(q) | Complex 2 | NBO(q) |
|-----------|--------|-----------|--------|
| Cu1       | 1.598  | Ni1       | 1.393  |
| P 34      | 2.161  | P37       | 2.213  |
| O52       | -0.927 | O34       | -0.801 |
| H53       | 0.462  | H35       | 0.476  |
| H54       | 0.438  | H36       | 0.433  |
| O36       | -1.070 | O39       | -1.024 |
| O37       | -0.887 | O40       | -1.010 |
| O35       | -1.001 | O38       | -1.007 |
| O51       | -0.805 | O54       | -0.692 |

## Coordinates of all the optimized geometries

### Complex 1

|    |       |        |       |
|----|-------|--------|-------|
| Cu | 5.711 | 13.043 | 6.366 |
| N  | 4.315 | 12.152 | 7.416 |
| N  | 6.231 | 11.165 | 5.917 |
| N  | 5.614 | 14.898 | 6.984 |
| N  | 7.105 | 13.774 | 5.157 |
| O  | 9.103 | 11.903 | 6.015 |
| H  | 8.576 | 11.98  | 6.638 |
| C  | 4.553 | 10.796 | 7.462 |
| C  | 5.587 | 10.322 | 6.643 |
| H  | 5.804 | 9.418  | 6.625 |
| C  | 5.035 | 15.682 | 7.919 |
| H  | 4.357 | 15.404 | 8.493 |

|   |       |        |       |
|---|-------|--------|-------|
| C | 2.834 | 11.179 | 8.8   |
| H | 2.122 | 11.072 | 9.389 |
| C | 3.262 | 12.379 | 8.236 |
| H | 2.882 | 13.212 | 8.401 |
| C | 7.346 | 15.003 | 5.399 |
| H | 8.019 | 15.453 | 4.942 |
| C | 3.647 | 10.193 | 8.332 |
| H | 3.607 | 9.29   | 8.553 |
| C | 7.931 | 13.018 | 4.209 |
| H | 8.706 | 13.549 | 3.961 |
| H | 7.419 | 12.84  | 3.405 |
| C | 6.568 | 15.666 | 6.372 |
| C | 5.584 | 16.951 | 7.911 |
| H | 5.345 | 17.664 | 8.459 |
| C | 8.387 | 11.712 | 4.817 |
| H | 9.018 | 11.317 | 4.18  |
| C | 7.252 | 10.699 | 4.982 |
| H | 6.842 | 10.537 | 4.116 |
| H | 7.618 | 9.859  | 5.3   |
| C | 6.559 | 16.946 | 6.925 |
| H | 7.103 | 17.658 | 6.68  |

## **Complex 2**

|    |       |       |       |
|----|-------|-------|-------|
| Ni | 0.238 | 8.774 | 6.831 |
| O  | 2.176 | 7.192 | 4.391 |
| H  | 1.618 | 6.707 | 3.991 |

|   |        |       |        |
|---|--------|-------|--------|
| N | -0.3   | 8.688 | 5.008  |
| N | 2.051  | 9.169 | 6.402  |
| N | 0.848  | 8.859 | 8.622  |
| N | -1.546 | 8.252 | 7.176  |
| C | 2.218  | 8.963 | 8.69   |
| C | -2.292 | 8.137 | 6.021  |
| C | -1.55  | 8.383 | 4.842  |
| H | -1.943 | 8.326 | 3.979  |
| C | 2.84   | 9.15  | 7.436  |
| H | 3.78   | 9.257 | 7.352  |
| C | 2.631  | 9.415 | 5.084  |
| H | 3.601  | 9.215 | 5.109  |
| H | 2.521  | 10.37 | 4.849  |
| C | 1.968  | 8.557 | 4.026  |
| H | 2.448  | 8.715 | 3.163  |
| C | 0.517  | 8.932 | 3.82   |
| H | 0.462  | 9.891 | 3.58   |
| H | 0.152  | 8.408 | 3.063  |
| C | 0.409  | 8.75  | 9.903  |
| H | -0.502 | 8.673 | 10.161 |
| C | 1.487  | 8.765 | 10.783 |
| H | 1.443  | 8.698 | 11.73  |
| C | -3.574 | 7.682 | 6.312  |
| H | -4.278 | 7.519 | 5.694  |
| C | -2.36  | 7.855 | 8.193  |

|   |        |       |        |
|---|--------|-------|--------|
| H | -2.111 | 7.817 | 9.11   |
| C | 2.639  | 8.897 | 10.02  |
| H | 3.533  | 8.934 | 10.338 |
| C | -3.612 | 7.514 | 7.688  |
| H | -4.359 | 7.219 | 8.196  |

**Coordinates of all the optimized geometries of the metal complexes with pNPP  
(1+pNPP)**

Cu adduct-

|    |          |          |          |
|----|----------|----------|----------|
| Cu | -1.22527 | -0.17584 | -2.28604 |
| N  | 0.01298  | -1.43282 | -1.66998 |
| N  | 0.12767  | 0.95871  | -1.55411 |
| N  | -2.36347 | -1.38729 | -1.43131 |
| N  | -2.65373 | 0.95924  | -1.71738 |
| O  | -1.4435  | 2.43294  | 0.38457  |
| H  | -1.44123 | 1.47284  | 0.38376  |
| C  | 1.11255  | -0.98728 | -1.17245 |
| C  | 1.2097   | 0.37454  | -1.10718 |
| H  | 2.06351  | 0.89929  | -0.73057 |
| C  | -2.22377 | -2.68223 | -1.0989  |
| H  | -1.3459  | -3.27825 | -1.23345 |
| C  | 1.2432   | -3.17197 | -1.08084 |
| H  | 1.56946  | -4.17786 | -0.91679 |
| C  | 0.00276  | -2.77087 | -1.62755 |
| H  | -0.79032 | -3.41307 | -1.94832 |

C -3.74211 0.37289 -1.29883  
H -4.67015 0.8734 -1.11718  
C 1.94449 -2.03963 -0.80194  
H 2.92692 -1.97219 -0.38238  
C -2.58256 2.42224 -1.72576  
H -3.43252 2.81219 -1.20642  
H -2.58642 2.77185 -2.73705  
C -3.52769 -0.95961 -1.0889  
C -3.41376 -3.10161 -0.56324  
H -3.63888 -4.08707 -0.21223  
C -1.33336 2.91208 -0.95866  
H -1.33295 3.98224 -0.97342  
C 0.02269 2.42942 -1.51318  
H 0.17646 2.80913 -2.5017  
H 0.77761 2.80751 -0.85582  
C -4.28167 -1.99759 -0.56186  
H -5.29634 -1.9638 -0.22355  
P -1.62176 0.67792 -5.01718  
O -0.98208 1.57181 -6.32761  
O -0.56293 0.77578 -3.70363  
O -1.8124 -0.95677 -5.48341  
C -5.75286 0.14879 -6.97018  
C -4.86703 0.17609 -5.88356  
C -4.03805 1.2894 -5.68423  
C -4.0895 2.36938 -6.57652

|   |          |          |          |
|---|----------|----------|----------|
| C | -4.97429 | 2.3399   | -7.66263 |
| C | -5.80636 | 1.23062  | -7.85873 |
| H | -6.38839 | -0.69828 | -7.1212  |
| H | -4.82543 | -0.65179 | -5.20671 |
| H | -3.45341 | 3.2165   | -6.42837 |
| H | -5.01499 | 3.16529  | -8.34193 |
| N | -6.73491 | 1.20305  | -8.99766 |
| O | -7.47141 | 0.22363  | -9.17245 |
| O | -6.78072 | 2.15909  | -9.78199 |
| O | -3.13981 | 1.32783  | -4.57055 |
| O | -1.91608 | -1.00379 | -3.76432 |
| H | -2.1707  | -1.46005 | -4.74851 |
| H | -2.87141 | -1.05336 | -3.68526 |

Ni adduct-

**(2+pNPP)**

|    |          |          |         |
|----|----------|----------|---------|
| Ni | -0.158   | 11.95749 | 6.51182 |
| O  | 1.93938  | 9.89896  | 4.23006 |
| H  | 1.5963   | 9.31546  | 3.54907 |
| N  | -0.53228 | 11.14855 | 4.83874 |
| N  | 1.71784  | 11.97068 | 6.2494  |
| N  | 0.44059  | 11.63972 | 8.23433 |
| N  | -1.27044 | 10.55471 | 6.99239 |
| C  | 1.71411  | 11.64655 | 8.43259 |

|   |          |          |          |
|---|----------|----------|----------|
| C | -1.87065 | 9.91258  | 6.04986  |
| C | -1.50608 | 10.2831  | 4.7942   |
| H | -1.93824 | 9.89618  | 3.89508  |
| C | 2.46617  | 11.84515 | 7.31328  |
| H | 3.53511  | 11.88698 | 7.30639  |
| C | 2.35384  | 12.15569 | 4.93151  |
| H | 3.3855   | 11.88083 | 5.00756  |
| H | 2.27089  | 13.18648 | 4.656    |
| C | 1.7313   | 11.25963 | 3.84118  |
| H | 2.23483  | 11.46413 | 2.91956  |
| C | 0.21407  | 11.44587 | 3.61217  |
| H | -0.01668 | 12.43882 | 3.28674  |
| H | -0.07071 | 10.74411 | 2.85594  |
| C | -0.21226 | 11.38831 | 9.38116  |
| H | -1.27163 | 11.30572 | 9.5046   |
| C | 0.76374  | 11.25796 | 10.39345 |
| H | 0.58719  | 11.06364 | 11.43051 |
| C | -2.74578 | 8.9654   | 6.56993  |
| H | -3.40212 | 8.31615  | 6.02942  |
| C | -1.61319 | 10.05346 | 8.19095  |
| H | -1.2365  | 10.36645 | 9.14218  |
| C | 2.00899  | 11.43228 | 9.7744   |
| H | 2.97487  | 11.40355 | 10.23259 |
| C | -2.57169 | 9.04201  | 7.9589   |
| H | -3.06788 | 8.44954  | 8.69901  |



|   |          |          |         |
|---|----------|----------|---------|
| O | -1.59975 | 12.96454 | 6.94003 |
| H | -1.45289 | 13.38778 | 7.78914 |
| H | -2.13261 | 11.96665 | 4.60709 |
| P | -1.1732  | 14.22856 | 5.24316 |
| O | -0.84503 | 15.76258 | 4.5623  |
| O | 0.19693  | 13.57333 | 5.77749 |
| O | -1.86445 | 13.21318 | 4.05359 |
| C | -5.71818 | 14.73196 | 5.15578 |
| C | -4.52296 | 14.16168 | 5.61611 |
| C | -3.48422 | 14.98484 | 6.07256 |
| C | -3.63929 | 16.37745 | 6.06572 |
| C | -4.83385 | 16.94739 | 5.60591 |
| C | -5.874   | 16.1252  | 5.15254 |
| H | -6.51117 | 14.10338 | 4.80719 |
| H | -4.4034  | 13.09817 | 5.61919 |
| H | -2.8455  | 17.00591 | 6.4118  |
| H | -4.95245 | 18.01067 | 5.60091 |
| N | -7.12759 | 16.72609 | 4.67402 |
| O | -8.04849 | 16.00289 | 4.27322 |
| O | -7.26199 | 17.95672 | 4.67266 |
| O | -2.26629 | 14.40471 | 6.54594 |
